# Supplementary material for: Comparative mitochondrial genomics toward exploring molecular markers in the medicinal fungus Cordyceps militaris
Source: PubMed Central journal article supplement (PMC5223169; doi:10.1038/srep40219), 2017-01-10
Supplement: srep40219-s1.pdf [file srep40219-s1.pdf]

**Comparative mitochondrial genomics toward exploring molecular markers in the medicinal fungus *Cordyceps militaris***

Shu Zhang <sup>1,2</sup>, Ai-Jing Hao <sup>2</sup>, Yu-Xiang Zhao <sup>2</sup>, Xiao-Yu Zhang <sup>3</sup>, Yong-Jie Zhang <sup>2\*</sup>

<sup>1</sup> Institute of Applied Chemistry, Shanxi University, Taiyuan 030006, China;

<sup>2</sup> School of Life Sciences, Shanxi University, Taiyuan Shanxi 030006, China

<sup>3</sup> Farm Product Storage and Freshening Institute, Shanxi Academy of Agricultural Sciences, Taiyuan Shanxi 030031, China

Correspondence and requests for materials should be addressed to Y.J.Z. (email: zhangyj2008@sxu.edu.cn)

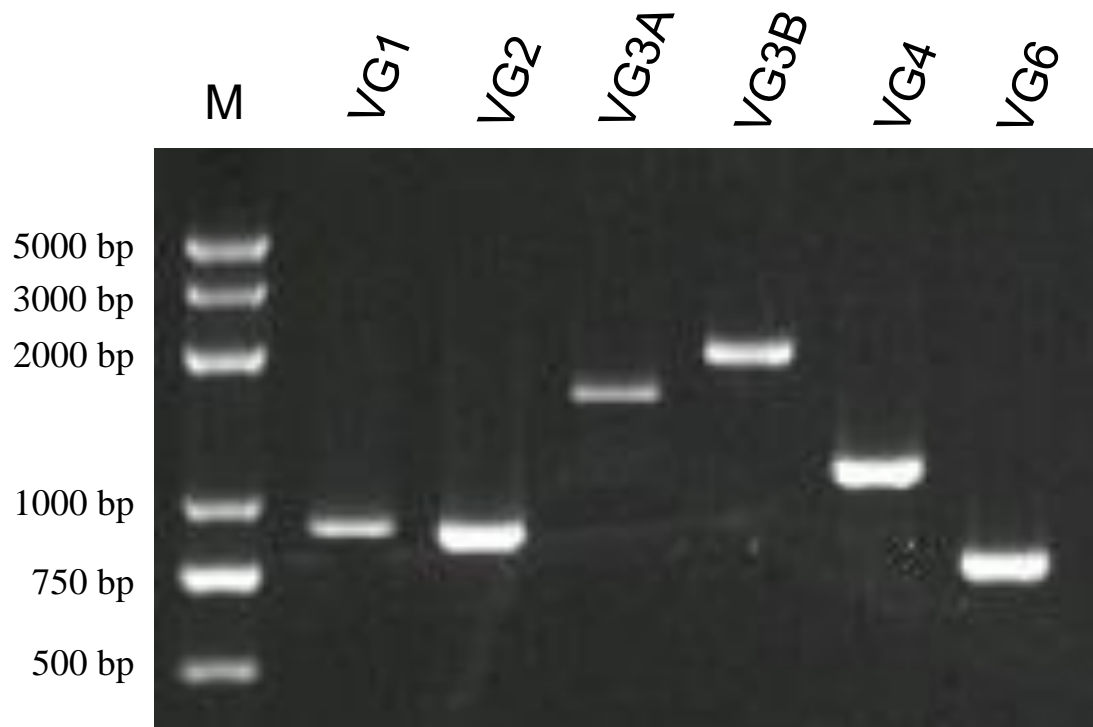

**Fig. S1** Electrophoretic pattern of five molecular markers (VG1-4, 6) from a representative *C. militaris* strain. The fragment VG3 was amplified by dividing it into two small fragments VG3A and VG3B due to its length. Amplifications in this figure were all performed with the *C. militaris* strain CM06 as templates.

**Table S1. Recombination analysis of various regions**

|                                     | No. loci | PrCP  | Index of association | <i>P</i> value |
|-------------------------------------|----------|-------|----------------------|----------------|
| Exonic loci                         | 24       | 0.978 | 6.444                | < 0.001        |
| Intronic loci                       | 8        | 1.000 | 1.595                | < 0.001        |
| Intergenic loci                     | 15       | 1.000 | 4.306                | < 0.001        |
| Exonic & intronic loci              | 32       | 0.988 | 7.693                | < 0.001        |
| Exonic & intergenic loci            | 39       | 0.987 | 11.115               | < 0.001        |
| Intronic & intergenic loci          | 23       | 1.000 | 4.919                | < 0.001        |
| Exonic & intronic & intergenic loci | 47       | 0.991 | 11.975               | < 0.001        |

PrCP, percentage of compatible locus pairs; IA, index of association. *P* values are those to reject the null hypothesis of random recombination.

**Table S2. Loci showing evidence of recombination**

| Strain     | <i>rnl</i> -E1 | <i>rnl</i> -E2 | <i>nad3</i> | <i>cox2</i> | E1 | <i>nad4L</i> | <i>nad3-atp9</i> | IR | <i>atp9-cox2</i> | IR | <i>cox2-nad4L</i> | IR | <i>nad5-cob</i> | IR |
|------------|----------------|----------------|-------------|-------------|----|--------------|------------------|----|------------------|----|-------------------|----|-----------------|----|
| V26-17     | 1              | 2              | 2           | 2           | 2  | 2            | 2                | 2  | 2                | 2  | 2                 | 2  | 2               | 2  |
| V40-4      | 1              | 1              | 2           | 2           | 2  | 2            | 2                | 2  | 2                | 2  | 2                 | 2  | 2               | 2  |
| V40-5      | 1              | 1              | 2           | 3           | 2  | 2            | 2                | 2  | 2                | 2  | 3                 | 2  | 2               | 2  |
| CM09-9-24  | 1              | 1              | 2           | 2           | 2  | 2            | 2                | 2  | 2                | 2  | 2                 | 2  | 2               | 2  |
| CM09-31-28 | 1              | 1              | 1           | 2           | 1  | 3            | 1                | 1  | 1                | 1  | 1                 | 1  | 3               | 3  |
| CM552      | 1              | 1              | 1           | 1           | 1  | 1            | 1                | 1  | 1                | 1  | 1                 | 1  | 1               | 1  |
| CM01       | 1              | 1              | 1           | 1           | 1  | 1            | 1                | 1  | 1                | 1  | 1                 | 1  | 1               | 1  |
| CM06       | 2              | 1              | 2           | 2           | 3  | 4            | 3                | 3  | 3                | 3  | 4                 | 4  | 4               | 4  |
| F02        | 1              | 1              | 1           | 1           | 1  | 1            | 1                | 1  | 1                | 1  | 1                 | 1  | 1               | 1  |
| CMB        | 1              | 1              | 1           | 1           | 1  | 1            | 1                | 1  | 1                | 1  | 1                 | 1  | 1               | 1  |
| EFCC-C2    | 2              | 2              | 1           | 1           | 1  | 3            | 1                | 1  | 1                | 1  | 1                 | 1  | 3               | 3  |

Notes: Numbers in this table are allele identifiers. IR, intergenic region

*rnl*-E1 showed recombination with other loci shown in yellow.

*rnl*-E2 showed recombination with other loci shown in blue.

**Table S3. Primers designed to amplify marker fragments**

| Locus | Primer name | Primer sequence         | Direction | Size (bp) | Notes                              |
|-------|-------------|-------------------------|-----------|-----------|------------------------------------|
| VG1   | VG1-F       | GTTTCGATCCCTGTCTAGTCTAT | F         |           |                                    |
|       | VG1-R       | TGAGATCAGTGTCTAACCGTT   | R         | 884       | within <i>rnl</i> - <i>nad2</i> IR |
| VG2   | VG2-F       | TATTCGAATTAGGTAAAGGTGCT | F         |           |                                    |
|       | VG2-R       | TGGAGTAGCACTATCTTGGAAT  | R         | 888       | 3' <i>nad3</i> -- 5' <i>cox2</i>   |
| VG3A  | VG3A-F      | ATATGAACTATTACACCGGCAT  | F         |           |                                    |
|       | VG3A-R      | AAGAAAGCATCACCAACTCTAT  | R         | 1510      | 3' <i>cox2</i> -- 5' <i>nad5</i>   |
| VG3B  | VG3B-F      | AATGTTTGTAGGATGAGAAGGT  | F         |           |                                    |
|       | VG3B-R      | TATTAGTTGGTTGTGAATGATCA | R         | 1850      | 5'- <i>nad5</i> -- 5' <i>cob</i>   |
| VG4   | VG4-F       | CTAAACCTCATGCATTCGTAAG  | F         |           |                                    |
|       | VG4-R       | GCTTGAGTAGGTGCTATATATTC | R         | 1132      | 3' <i>cox1</i> to 5' <i>nad1</i>   |
| VG6   | VG6-F       | GTACAATATTCTTAGCAGTAGGT | F         |           |                                    |
|       | VG6-R       | TGAAATCGAAGCAAATAATCCT  | R         | 771       | 3' <i>cox3</i> to 5' <i>nad6</i>   |

The fragment VG3 was amplified by combining two small fragments VG3A and VG3B.
